# Supplementary material
Source: publisher site journal article supplement (https://www.kjim.org/upload/media/kjim-2023-206-Supplementary-1.pdf)
Supplement: Supplementary file 1 [file kjim-2023-206-Supplementary-1.pdf]

### **III. Supplement**

1. PICO
2. Developers
3. Patient preferences
4. Review and approval
5. Conflict of interests
6. Searching terms and strategies
7. Literature selection
8. Evidence tables

## 1. PICOs

PICO 1. Should we use NSAIDs over colchicine/corticosteroids in patients experiencing a gout flare to reduce the duration of the flare?

|              |                                   |
|--------------|-----------------------------------|
| Patients     | Patient experiencing a gout flare |
| Intervention | Using NSAID                       |
| Comparator   | Using Colchicine/steroid          |
| Outcome      | Duration of the flare             |

PICO 2 Should clinicians initiate ULT during gout flares vs. after gout flares have resolved?

|              |                                                                         |
|--------------|-------------------------------------------------------------------------|
| Patients     | Patient experiencing a gout flare who did not receive ULT before        |
| Intervention | Start ULT during a gout flare with a concomitant anti-inflammatory drug |
| Comparator   | Use anti-inflammatory drug only                                         |
| Outcome      | Gout flares (duration, pain severity)                                   |

PICO 3. Prophylaxis vs. no prophylaxis in patients with gout starting ULT

|              |                                                           |
|--------------|-----------------------------------------------------------|
| Patients     | Gout patients initiating ULT                              |
| Intervention | Use prophylactic anti-inflammatory drugs                  |
| Comparator   | Initiate ULT without prophylactic anti-inflammatory drugs |
| Outcome      | Gout flares                                               |

PICO 4. Should ULT be prescribed to achieve serum urate <6mg/dL in gout in order to prevent gout flares and bone erosion?

|              |                                                |
|--------------|------------------------------------------------|
| Patients     | Gout patients                                  |
| Intervention | prescribing ULT to achieve serum urate <6mg/dL |
| Comparator   | serum urate ≥6mg/dL                            |
| Outcome      | Gout flares, bone erosion                      |

PICO 5. Should ULT be stopped vs. continued for patients with gout on ULT?

|              |                |
|--------------|----------------|
| Patients     | Gout patients  |
| Intervention | Stopping ULT   |
| Comparator   | Continuing ULT |
| Outcome      | Gout flares    |

PICO 6. Should xanthine oxidase inhibitors be prescribed over uricosuric agents in chronic tophaceous gout?

|              |                                            |
|--------------|--------------------------------------------|
| Patients     | Patients with tophaceous gout              |
| Intervention | Prescription of xanthine oxidase inhibitor |
| Comparator   | Prescription of uricosuric agent           |
| Outcome      | Tophi size, bone erosion                   |

PICO 7. Should ULT be used in gout patients vs. no treatment in order to preserve renal function?

|              |                                                                                                   |
|--------------|---------------------------------------------------------------------------------------------------|
| Patients     | Patients with gout                                                                                |
| Intervention | Using ULT (allopurinol, febuxostat, benzbromarone, pegloticase)                                   |
| Comparator   | Not using ULT (allopurinol, febuxostat, benzbromarone, pegloticase)                               |
| Outcome      | Benefit – renoprotective effect<br>Harm – adverse events of ULT<br>Patients' value and preference |

PICO 8. Should prescribing ULT be used to improve cardiovascular outcomes in patients with gout vs. no treatment?

|              |                         |
|--------------|-------------------------|
| Patients     | Patients with gout      |
| Intervention | Prescribing ULT         |
| Comparator   | No treatment            |
| Outcome      | Cardiovascular outcomes |

PICO 9. Should prescribing ULT vs. no treatment be used in CKD 3,4 patients with asymptomatic hyperuricemia in order to protect renal function?

|              |                                                        |
|--------------|--------------------------------------------------------|
| Patients     | Asymptomatic hyperuricemia patients with CKD stage 3,4 |
| Intervention | Prescribing ULT                                        |
| Comparator   | Not prescribing ULT                                    |
| Outcome      | Renoprotective effect                                  |
